# Supplementary material for: Interfacial rheology of polymer/carbon nanotube films co-assembled at the oil/water interface
Source: Royal Society of Chemistry journal article supplement (doi:10.1039/c6sm00466k), 2016-01-01
Supplement: c6sm00466k1.pdf [file c6sm00466k1.pdf]

## Interfacial Rheology of Polymer/Carbon Nanotube Films Co-Assembled at the Oil/Water Interfaces

Tao Feng<sup>1</sup>, David A. Hoagland<sup>1\*</sup>, Thomas P. Russell<sup>1,2,3\*</sup>

<sup>1</sup>Polymer Science and Engineering Department, University of Massachusetts at Amherst, Amherst, 01003, USA

<sup>2</sup>Materials Sciences Division, Lawrence Berkeley National Laboratory, Berkeley, California 94720, USA

<sup>3</sup>WPI—Advanced Institute for Materials Research (WPI-AIMR), Tohoku University, 2-1-1 Katahira, Aoba, Sendai 980-8577, Japan

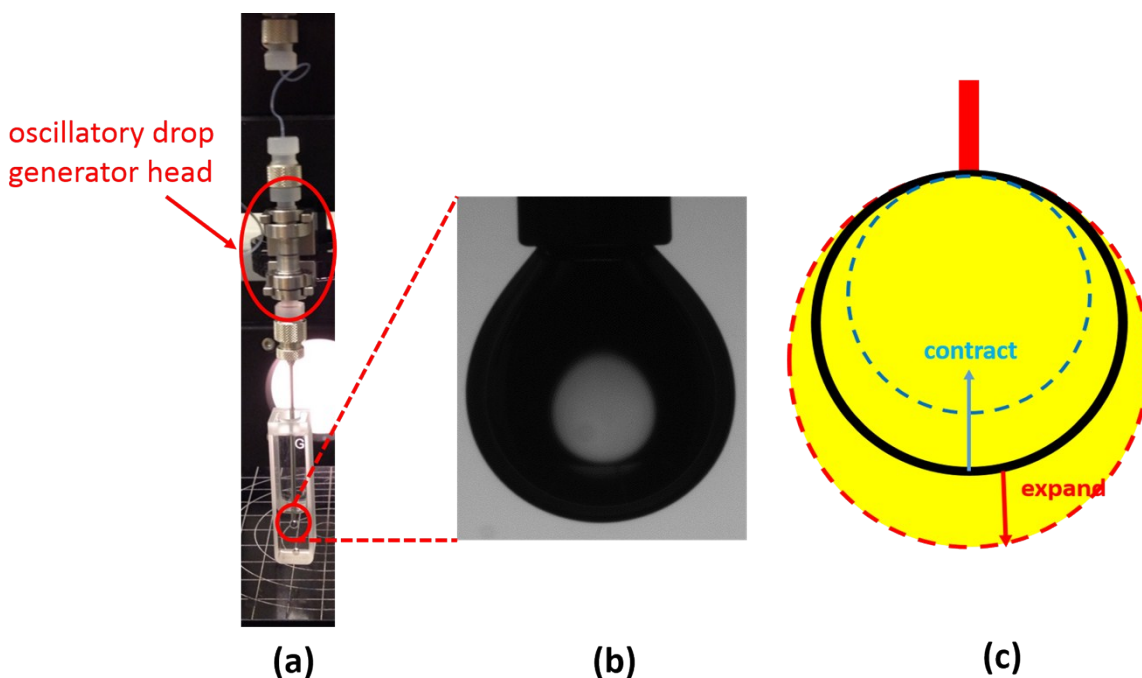

**Figure S1.** (a) Apparatus for oscillatory pendant drop rheometry; (b) axisymmetric profile of an aqueous droplet created in the oil phase; and (c) scheme for generating dilatational strain by drop expansion and contraction.

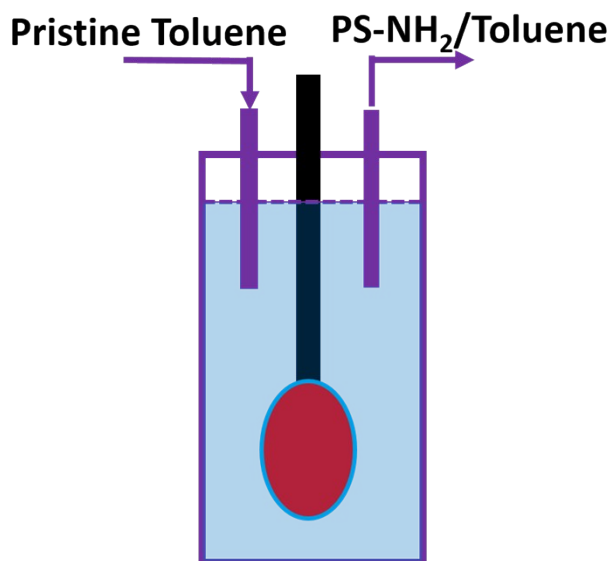

**Figure S2.** Apparatus for PS-NH<sub>2</sub> desorption by bulk phase exchange.

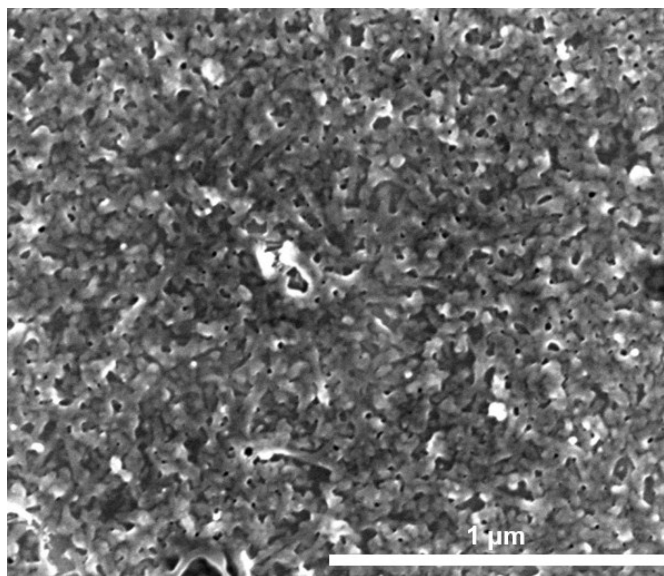

**Figure S3.** SEM micrograph of a dried co-assembled film on a Si substrate. (The condition of film formation:  $C_{SWCNT}=0.08$  mg/ml;  $C_{PS-NH_2}=0.2$  mg/ml, pH=3.1) (Scale bar: 1 μm).

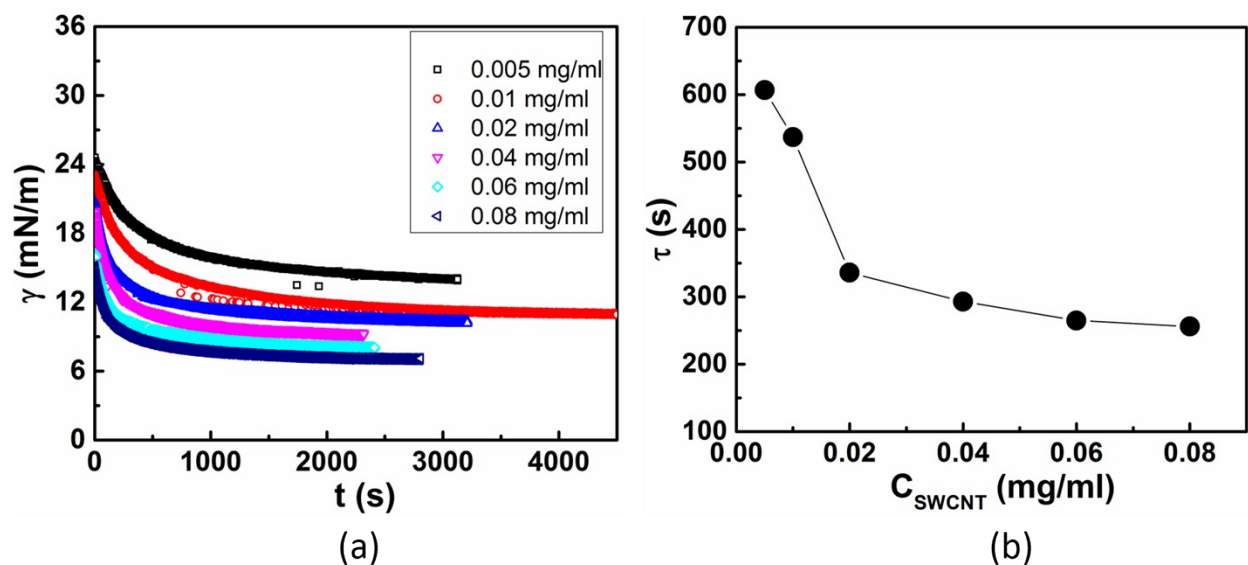

**Figure S4.** (a)  $\gamma(t)$  for co-assembled film as a function of  $C_{SWCNT}$  ( $C_{PS-NH_2}=0.2$  mg/ml, PS-NH<sub>2</sub>  $M_n \sim 2,800$  g/mol, pH=3.0). (b) Characteristic timescale  $\tau$  of SWCNT adsorption deduced by fit to a single exponential decay.

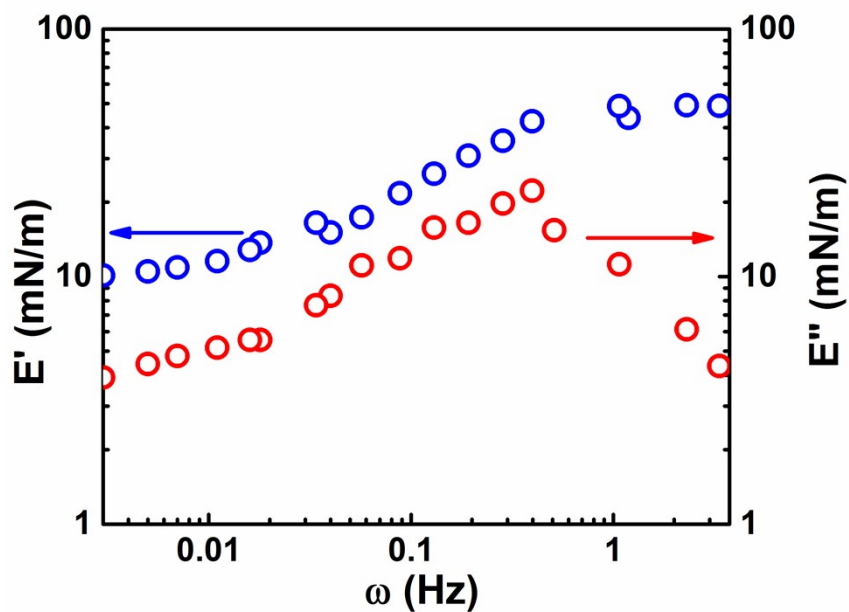

**Figure S5.**  $E'(\omega)$  and  $E''(\omega)$  for an Au NP/PS-NH<sub>2</sub> co-assembled film (5 nm, multiply carboxylated Au NPs;  $C_{Au\ NPs}=0.05$  mg/ml;  $C_{PS-NH_2}=0.2$  mg/ml; PS-NH<sub>2</sub>  $M_n \sim 2,800$  g/mol; pH=3.0).

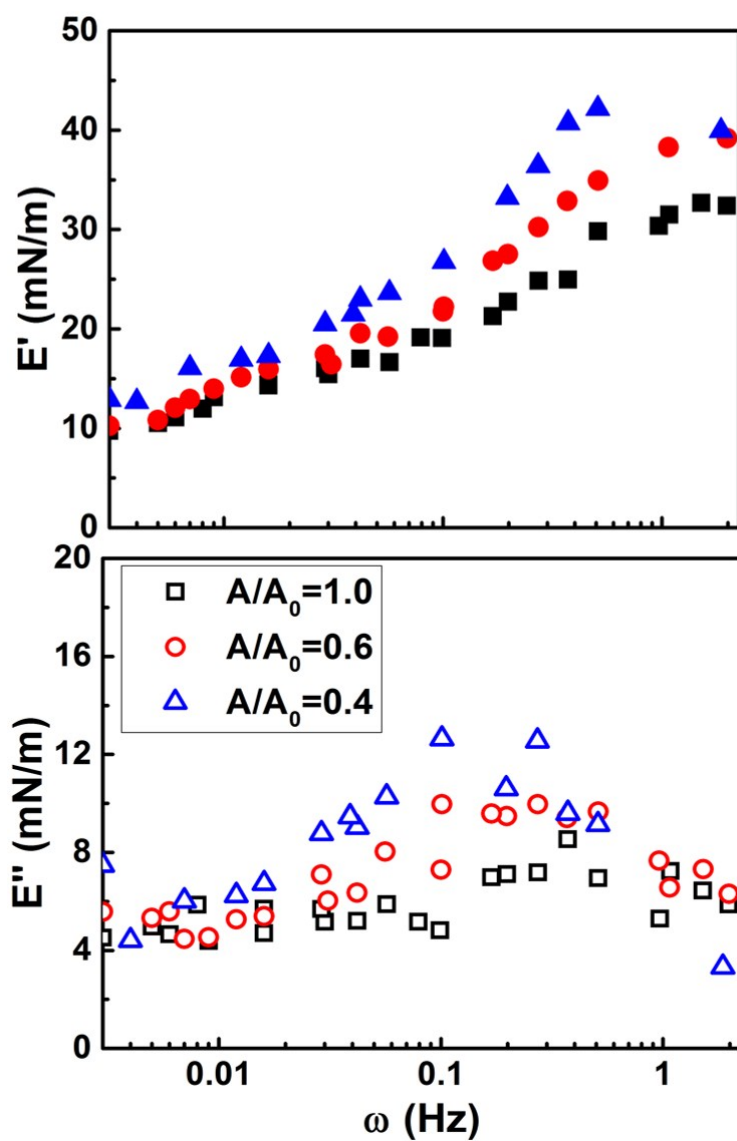

**Figure S6.**  $E'(\omega)$  and  $E''(\omega)$  at different compressed areal density for a  $C_{PS-NH_2}$  below saturation ( $C_{PS-NH_2}=0.05$  mg/ml,  $PS-NH_2$   $M_n \sim 2,800$  g/mol, pH=3.0).
